# Supplementary material for: Genome Mining and Analysis of PKS Genes in Eurotium cristatum E1 Isolated from Fuzhuan Brick Tea
Source: MDPI journal article supplement (doi:10.3390/jof8020193), 2022-02-16
Supplement: s1 [file s1]

## Supplementary Materials:

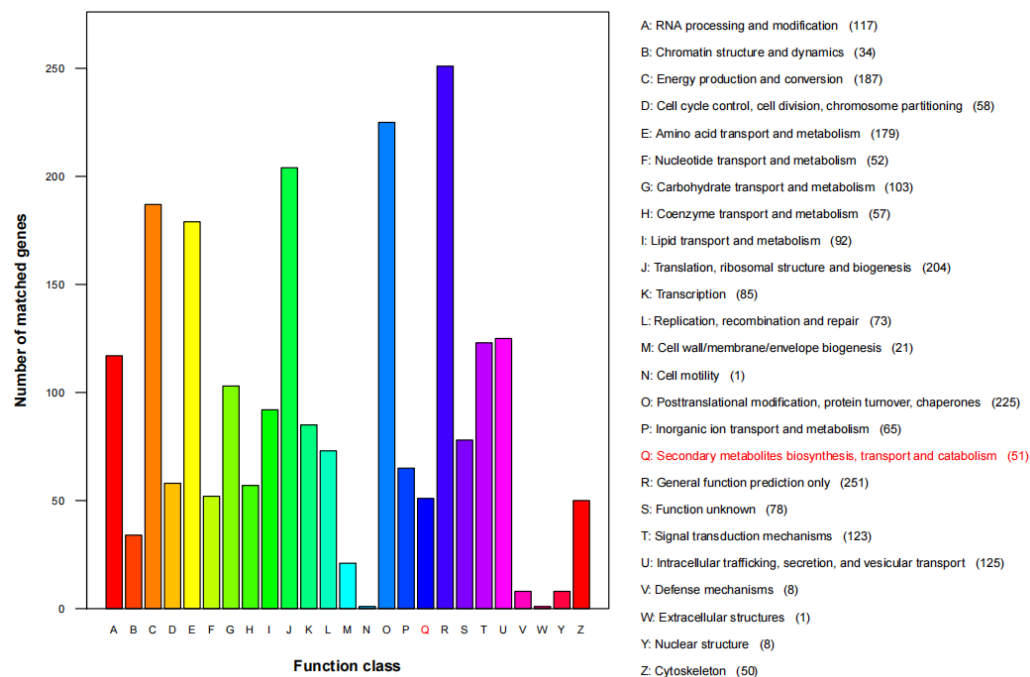

**Figure S1.** KOG distribution of predicted proteins from *Eurotium cristatum* E1 genome. KOG categories are as follows. M, O, T, U, V, W, Y and Z belong to cellular processes and signaling. A, B, J, K and L belong to information storage and processing. C, D, E, F, G, H, I, P and Q belong to metabolism. R and S belong to poorly characterized.

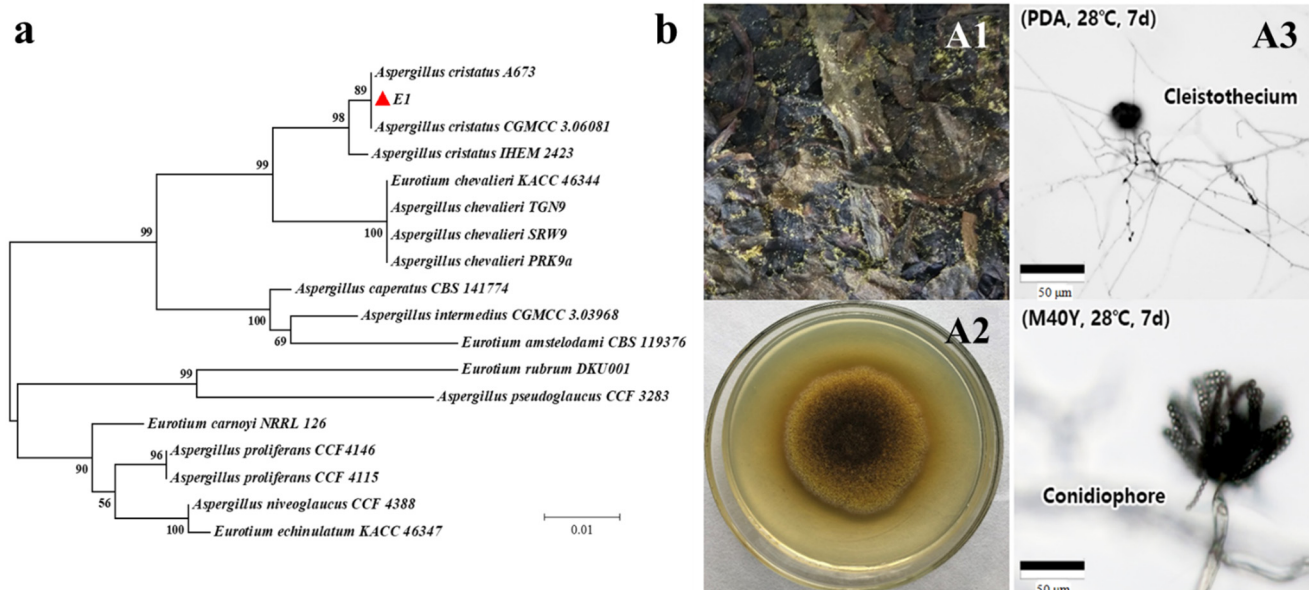

**Figure S2.** Confirmation of the taxonomic classification of *Eurotium cristatum* E1. (a) Phylogenetic tree. *E. cristatum* E1 sequence was compared with fragments of the partial  $\beta$ -tubulin (*BenA*), calmodulin (*CaM*) and RNA polymerase II second largest subunit (*RPB2*) genes of 18 *Aspergillus* species and *Eurotium* species retrieved from GenBank. [The phylogenetic tree was constructed by MEGA 5.05 based on Neighbor-Joining method.](#) Detail information of the sequences used in phylogenetic tree can be found in Supplementary Table S1. (b) Morphological characteristics of *E. cristatum* E1 isolated from Fuzhuan brick tea. (A1) A piece of Fuzhuan brick-tea with "Jinhua" (yellow dots) visible to the naked eye; (A2) Single colony grown on PDA agar in a 7 cm petri dish at 28 °C for 9 days; (A3) Microscopic image of cleistothecium and conidiophore (×200).

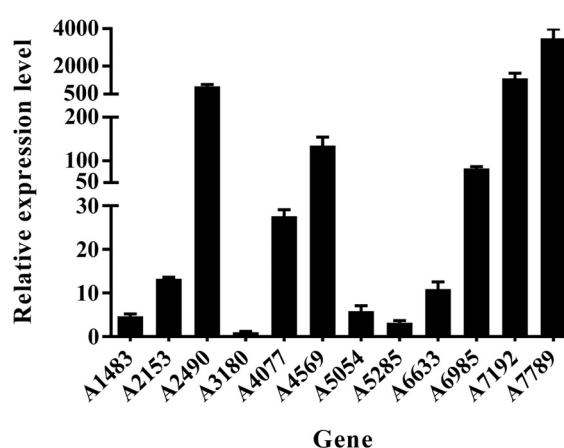

**Figure S3.** Real-time RT-PCR analysis of the PKS genes in *Eurotium cristatum* E1. Relative expression of the PKS genes in *E. cristatum* E1 was incubated in PDA medium for 5 days at 28 °C.  $\beta$ -actin was used as the reference gene. The error bars indicate the standard deviations of three independent repetitions.

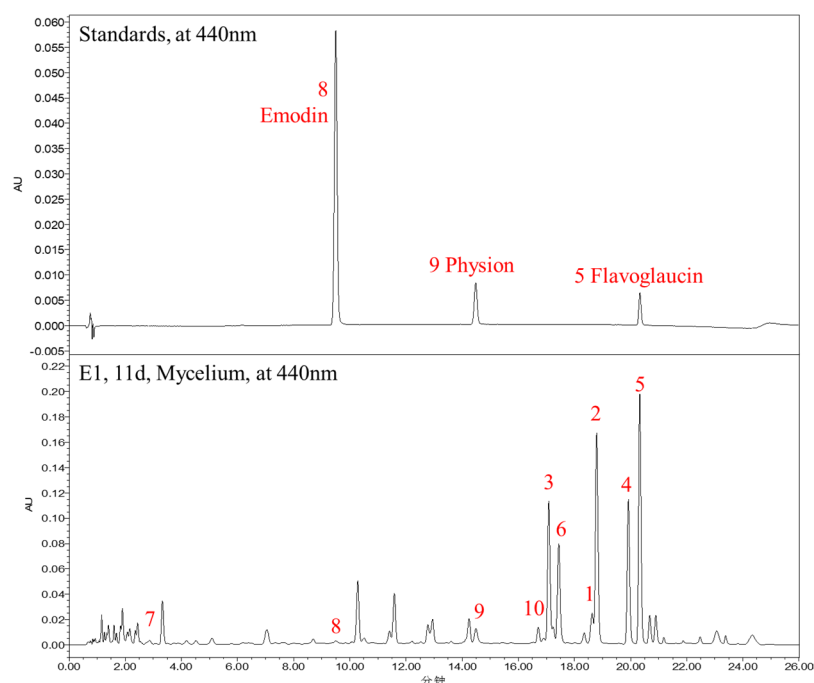

**Figure S4.** UPLC analysis of *Eurotium cristatum* E1 extracts. The strains were cultivated in PDA medium for 11 days at 28 °C.

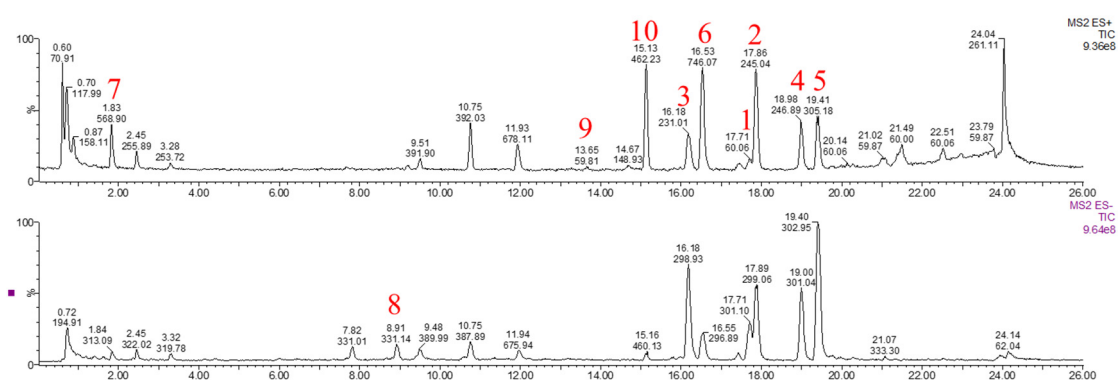

**Figure S5.** UPLC-MS analysis of *Eurotium cristatum* E1 extracts. The strains were cultivated in PDA medium for 11 days at 28 °C.

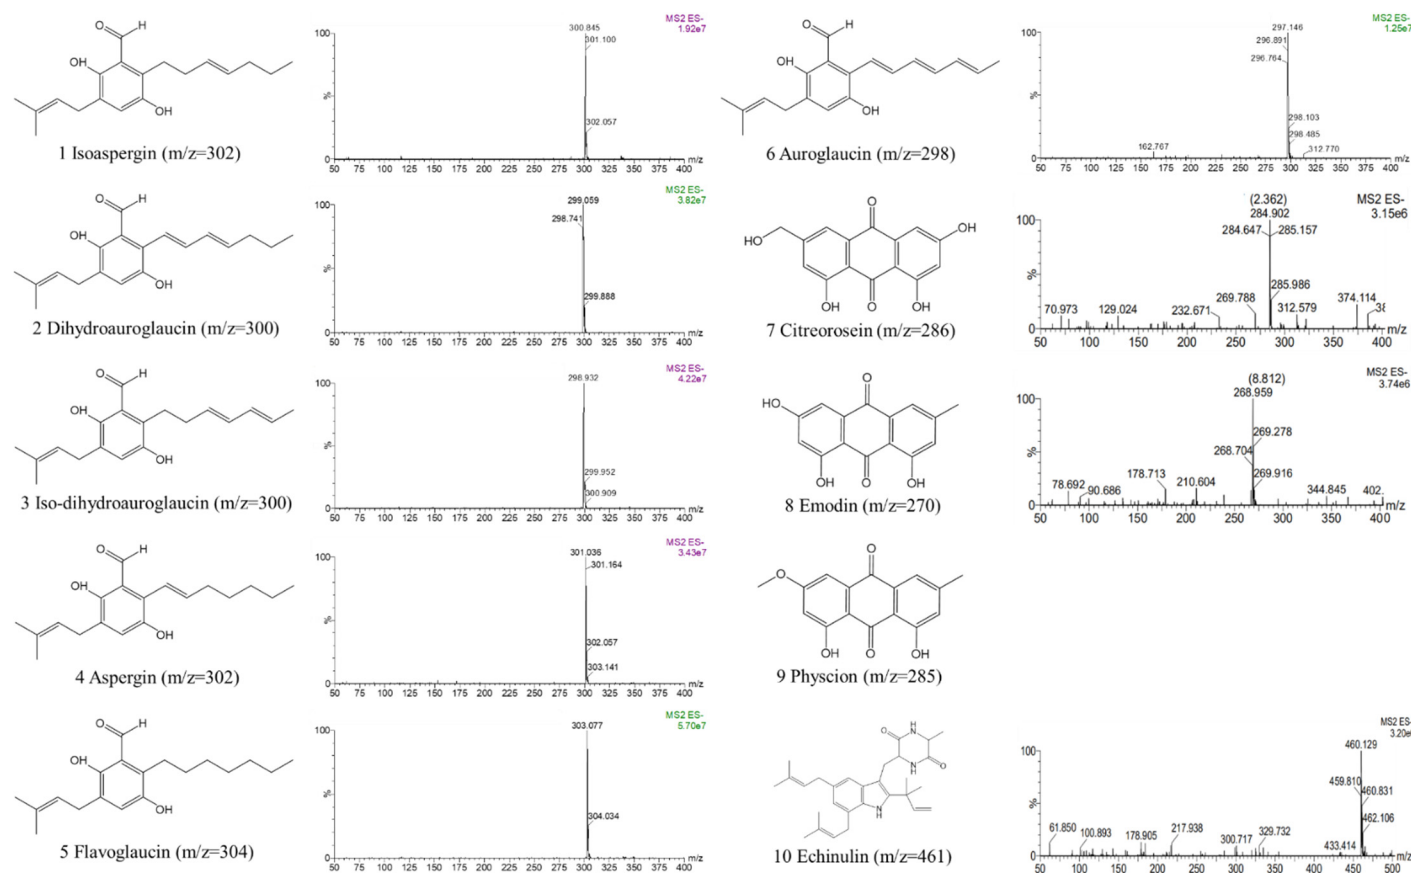

**Figure S6.** ESIMS spectra in negative mode of flavoglaucin and its derivatives (1-6), citreorosein (7), emodin (8), physcion (9) and echinulin (10).

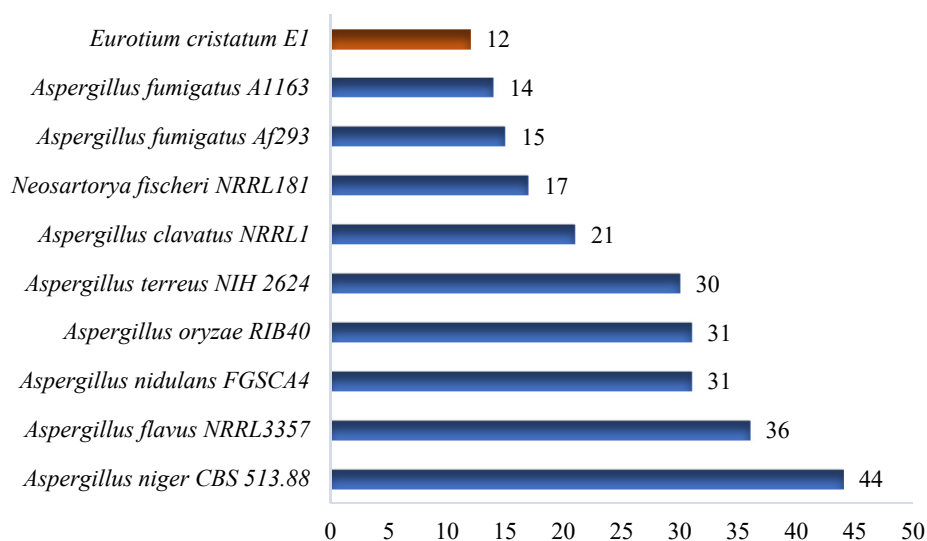

**Figure S7.** The number of PKS genes in some sequenced *Aspergillus* species.

**Table S1.** Strains and accession information of genes used for phylogenetic tree construction.

| Strain                                       | Accession        |            |            |
|----------------------------------------------|------------------|------------|------------|
|                                              | $\beta$ -tubulin | CaM        | RPB2       |
| <i>Aspergillus caperatus</i> CBS 141774      | LT671008.1       | LT671009.1 | LT671010.1 |
| <i>Aspergillus chevalieri</i> NRRL 78        | EF651911.1       | EF652002.1 | EF651954.1 |
| <i>Aspergillus chevalieri</i> NRRL 4755      | EF651913.1       | EF652004.1 | EF651956.1 |
| <i>Aspergillus cristatus</i> CGMCC 3.06081   | LT671061.1       | LT671062.1 | LT671063.1 |
| <i>Aspergillus cristatus</i> IHEM 2423       | LT671058.1       | LT671059.1 | LT671060.1 |
| <i>Eurotium cristatum</i> NRRL 4222          | EF651914.1       | EF652001.1 | EF651957.1 |
| <i>Eurotium echinulatum</i> NRRL 131         | EF651907.1       | EF651998.1 | EF651939.1 |
| <i>Eurotium herbariorum</i> NRRL 116         | EF651887.1       | EF651989.1 | EF651934.1 |
| <i>Eurotium repens</i> NRRL 13               | EF651915.1       | EF652005.1 | EF651950.1 |
| <i>Eurotium rubrum</i> NRRL 52               | EF651920.1       | EF652009.1 | EF651947.1 |
| <i>Eurotium tonophilum</i> NRRL 5124         | EF651919.1       | EF652000.1 | EF651969.1 |
| <i>Aspergillus intermedius</i> CGMCC 3.03968 | LT671082.1       | LT671083.1 | LT671084.1 |
| <i>Aspergillus proliferans</i> CCF 4146      | HE578076.1       | HE650909.1 | HE801304.1 |
| <i>Aspergillus proliferans</i> CCF 4115      | FR851855.1       | HE578090.1 | HE578107.1 |
| <i>Aspergillus pseudoglaucus</i> CCF 3283    | FR775360.2       | HE974439.1 | HE578110.2 |
| <i>Eurotium amstelodami</i> NRRL 90          | EF651897.1       | EF652017.1 | EF651963.1 |
| <i>Eurotium amstelodami</i> NRRL 4716        | EF651899.1       | EF652018.1 | EF651965.1 |
| <i>Eurotium carnoyi</i> NRRL 126             | EF651903.1       | EF651985.1 | EF651942.1 |

**Table S2.** Primers used for qRT-PCR.

| Primers               | Sequences (5'→3')     | Functions                                       |
|-----------------------|-----------------------|-------------------------------------------------|
| A1483-qPCR-f          | AGGTGGATGGTTGAGAAGGG  | For real time RT-PCR analysis of <i>A1483</i>   |
| A1483-qPCR-r          | TTCCTCCTACCGGCTTTCTG  |                                                 |
| A2153-qPCR-f          | GTCGTGGAGAAGGAGTTGGA  | For real time RT-PCR analysis of <i>A2153</i>   |
| A2153-qPCR-r          | CGAGCGGATGAGAGATTCCCT |                                                 |
| A2490-qPCR-f          | TCATTGATGACCCGGCTCTT  | For real time RT-PCR analysis of <i>A2490</i>   |
| A2490-qPCR-r          | TTGCCTGGCCATAGAAGACA  |                                                 |
| A3180-qPCR-f          | CCTAGCAGTTGTGTCCAGAGA | For real time RT-PCR analysis of <i>A3180</i>   |
| A3180-qPCR-r          | TCAAAATCAACAGCTGCCCC  |                                                 |
| A4077-qPCR-f          | ATGAGGGCGTTAGGTTCCAA  | For real time RT-PCR analysis of <i>A4077</i>   |
| A4077-qPCR-r          | ATGAGGACCCATTTCTGCCA  |                                                 |
| A4569-qPCR-f          | TGGAGGCCAAGCGATATCAT  | For real time RT-PCR analysis of <i>A4569</i>   |
| A4569-qPCR-r          | TAGACCGACAATACTCCCGC  |                                                 |
| A5054-qPCR-f          | ACCGTGAGATCAACAGTGGT  | For real time RT-PCR analysis of <i>A5054</i>   |
| A5054-qPCR-r          | GTGAATAGCGGCAAGACTGG  |                                                 |
| A5285-qPCR-f          | GGAAGAAACATTGCGTGGGT  | For real time RT-PCR analysis of <i>A5285</i>   |
| A5285-qPCR-r          | AAGCCTGGAAAGTCGATGGA  |                                                 |
| A6633-qPCR-f          | CCAGTGGTGAAATTGCTGCT  | For real time RT-PCR analysis of <i>A6633</i>   |
| A6633-qPCR-r          | GATTGTCGTGCTGGATGGAC  |                                                 |
| A6985-qPCR-f          | GGAAGGCCAATTGACGATCC  | For real time RT-PCR analysis of <i>A6985</i>   |
| A6985-qPCR-r          | CTTCGTGCCAGTTAATCCGG  |                                                 |
| A7192-qPCR-f          | CTTGGGTTTCGAGCTATCAC  | For real time RT-PCR analysis of <i>A7192</i>   |
| A7192-qPCR-r          | GTTGAGCACTACGTCGACAC  |                                                 |
| A7789-qPCR-f          | TACGATCCTCATCAACGGGG  | For real time RT-PCR analysis of <i>A7789</i>   |
| A7789-qPCR-r          | GAAATCATCCACGTCGCGAA  |                                                 |
| $\beta$ -actin-qPCR-f | TCTGGCACCACACATTCTACA | For real time RT-PCR analysis of $\beta$ -actin |
| $\beta$ -actin-qPCR-r | CGAAGACGATCTGGGTCATCT |                                                 |

Table S3. Analysis of A2490 gene cluster in *Eurotium cristatum* E1.

| ORF   | Size (bp/aa) | Homologs and related description                                                     | Sequence identity |
|-------|--------------|--------------------------------------------------------------------------------------|-------------------|
| A2499 | 4608/1535    | hypothetical protein (GenBank: XP_040633901.1)                                       | 75%               |
| A2498 | 1028/266     | <b>TATA-box-binding protein</b> (GenBank: XP_043134035.1)                            | 99%               |
| A2497 | 1452/436     | <b>fructosyl amino acid oxidasesarcosine oxidase</b> (GenBank: XP_040641941.1)       | 95%               |
| A2495 | 1110/351     | <b>ubiquinone/menaquinone biosynthesis-related protein</b> (GenBank: XP_040641942.1) | 87%               |
| A2494 | 1397/402     | hypothetical protein (GenBank: XP_022402423.1)                                       | 92%               |
| A2493 | 2139/694     | <b>fungal-specific transcription factor</b> (GenBank: KAE8149832.1)                  | 46%               |
| A2492 | 993/295      | <b>NADH-cytochrome b5 reductase-like protein</b> (GenBank: XP_040641945.1)           | 88%               |
| A2491 | 669/222      | <b>Methyltransferase</b> (GenBank: XP_040641946.1)                                   | 91%               |
| A2490 | 5496/1778    | <b>polyketide synthase</b> (GenBank: Q5BH30.1)                                       | 53%               |
| A2489 | 982/308      | <b>metallo-beta-lactamase</b> (GenBank: XP_040641948.1)                              | 91%               |
| A2488 | 1777/513     | <b>pisatin demethylase</b> (GenBank: XP_040641950.1)                                 | 92%               |
| A2487 | 1749/484     | <b>cytochrome P450</b> (GenBank: XP_040641951.1)                                     | 91%               |
| A2486 | 1202/359     | <b>NAD(P)-binding protein</b> (GenBank: XP_040641952.1)                              | 91%               |
| A2484 | 1349/409     | hypothetical protein (GenBank: XP_043134047.1)                                       | 94%               |
| A2483 | 956/207      | hypothetical protein (GenBank: RJE24327.1)                                           | 64%               |
| A2482 | 1555/494     | hypothetical protein (GenBank: XP_043134049.1)                                       | 97%               |
| A2481 | 2804/878     | <b>C6 transcription factor</b> (GenBank: XP_025574120.1)                             | 60%               |

**Table S4.** Analysis of A7192 gene cluster in *Eurotium cristatum* E1.

| ORF   | Size (bp/aa) | Homologs and related description                                                 | Sequence identity |
|-------|--------------|----------------------------------------------------------------------------------|-------------------|
| A7187 | 1689/562     | hypothetical protein (GenBank: XP_002375531.1)                                   | 48.21%            |
| A7189 | 4983/1660    | <b>Mitogen-Activated Protein (MAP) kinase</b> (GenBank: EYE95333.1)              | 95.54%            |
| A7190 | 1437/478     | <b>ammonium transporter</b> (GenBank: EYE95334.1)                                | 97.06%            |
| A7191 | 1158/385     | <b>nuclear mRNA splicing factor-associated protein</b> (GenBank: XP_025499988.1) | 81.41%            |
| A7192 | 7389/2462    | <b>polyketide synthase</b> (GenBank: EYE95336.1)                                 | 92.26%            |
| A7193 | 822/273      | <b>short chain dehydrogenase</b> (GenBank: EYE95337.1)                           | 91.54%            |
| A7194 | 612/203      | <b>short chain dehydrogenase</b> (GenBank: EYE95337.1)                           | 94.03%            |
| A7195 | 861/286      | <b>short chain dehydrogenase</b> (GenBank: EYE95338.1)                           | 93.01%            |
| A7196 | 1497/498     | <b>cytochrome P450</b> (GenBank: EYE95339.1)                                     | 86.80%            |
| A7197 | 1497/498     | <b>FAD-binding oxidoreductase</b> (GenBank: EYE95340.1)                          | 91.77%            |
| A7198 | 1047/348     | <b>short chain dehydrogenase</b> (GenBank: EYE95341.1)                           | 91.95%            |
| A7200 | 1308/435     | <b>DMATS superfamily prenyltransferase</b> (GenBank: ATP76208.1)                 | 90.57%            |
| A7201 | 1245/414     | <b>Transcription factor</b> (GenBank: EYE95343.1)                                | 86.06%            |
| A7202 | 1389/462     | <b>tubulin beta chain</b> (GenBank: EYE95344.1)                                  | 99.32%            |
| A7203 | 1233/410     | hypothetical protein (GenBank: XP_001269171.1)                                   | 70.75%            |
| A7204 | 750/249      | hypothetical protein (GenBank: XP_022400343.1)                                   | 74.77%            |
| A7205 | 2619/872     | <b>protein kinase domain family protein</b> (GenBank: TPR03492.1)                | 32.93%            |
